# Supplementary material
Source: publisher figshare collection journal article supplement (https://brill.figshare.com/ndownloader/files/31713866)
Supplement: Supplementary file 1 [file 31713866]

## Sheet: Table S2
No.	Taxon I	Taxon II	coverage	ATP 6	ATP 8	COB	COX1	COX2	COX3	NAD1	NAD2	NAD3	NAD4	NAD4L	NAD5	NAD6	12S rRNA	16S rRNA	number of genes
1	Carabidae	GQ344500_Damaster_mirabilissimus	complete	x	x	x	x	x	x	x	x	x	x	x	x	x	x	x	15
2	Carabidae	GU176340_Calosoma_sp	complete	x	x	x	x	x	x	x	x	x	x	x	x	x	x	x	15
3	Carabidae	JX313665_Promecognathus_crassus	partial	x	x	x	x	x	x	x	x	x	x	x	x	x			13
4	Carabidae	JX412738_Craspedophorus_nobilis	partial	x	x	x	x	x	x	x	x	x	x	x	x	x			13
5	Carabidae	JX412768_Hexagonia_terminalis	partial	x	x	x	x	x	x	x	x	x	x	x	x	x			13
6	Carabidae	JX412826_Brachinus_crepitans	partial	x	x	x	x	x	x	x	x	x	x	x	x	x	x	x	15
7	Carabidae	JX412835_Agonum_muelleri	partial	x	x	x	x	x	x	x		x	x	x	x	x			12
8	Carabidae	JX412855_Calleida_angusticollis	partial	x	x	x	x	x	x	x		x	x	x	x	x			12
9	Carabidae	KT876877_Abax_parallelepipedus	complete	x	x	x	x	x	x	x	x	x	x	x	x	x	x	x	12
10	Carabidae	KT876906_Nebria_brevicollis	complete	x	x	x	x	x	x	x	x	x	x	x	x	x	x	x	15
11	Carabidae	KT876910_Pterostichus_madidus	complete	x	x	x	x	x	x	x	x	x	x	x	x	x	x	x	15
12	Carabidae	KX035135_Amara_communis	complete	x	x	x	x	x	x	x	x	x	x	x	x	x	x	x	15
13	Carabidae	KX035142_Tachyta_nana	complete	x	x	x	x	x	x	x	x	x	x	x	x	x	x	x	15
14	Carabidae	KX035144_Trechoblemus_micros	partial	x	x	x	x	x	x	x		x	x	x	x	x	x	x	14
15	Carabidae	KX087231_Abax_parallelus	partial	x	x	x	x	x	x	x	x	x	x	x	x	x	x	x	15
16	Carabidae	KT876909_Pterostichus_niger	complete	x	x	x	x	x	x	x	x	x	x	x	x	x	x	x	15
17	Carabidae	KX087242_Bembidion_varium	partial	x	x	x	x	x	x	x	x	x	x	x	x	x	x	x	15
18	Carabidae	KX087243_Blethisa_multipunctata	complete	x	x	x	x	x	x	x	x	x	x	x	x	x	x	x	15
19	Carabidae	KX087286_Elaphrus_cupreus	complete	x	x	x	x	x	x	x	x	x	x	x	x	x	x	x	15
20	Carabidae	KX087304_Lebia_chlorocephala	partial	x	x	x	x	x	x	x	x	x	x	x	x	x	x	x	15
21	Carabidae	KX087338_Pogonus_iridipennis	partial	x	x	x	x	x	x	x	x	x	x	x	x	x	x	x	15
22	Carabidae	KX087349_Stomis_pumicatus	complete	x	x	x	x	x	x	x	x	x	x	x	x	x	x	x	15
23	Carabidae	KY992943_Carabus_lafossei	complete	x	x	x	x	x	x	x	x	x	x	x	x	x	x	x	13
24	Carabidae	MF497817_Metrius_contractus	partial	x	x	x	x	x	x	x	x	x	x	x	x	x	x	x	15
25	Carabidae	MF497819_Broscus_cephalotes	partial	x	x	x	x	x	x	x	x	x	x	x	x	x	x	x	15
26	Carabidae	MF497822_Scarites_buparius	partial	x	x	x	x	x	x	x	x	x	x	x	x	x	x	x	15
27	Carabidae	MN122833_Pterostichus_oblongopunctatus	partial	x	x	x	x	x	x	x	x	x	x	x	x	x			13
28	Carabidae	MN122835_Carabus_arvensis	partial	x	x	x	x	x	x	x	x	x	x	x	x	x			13
29	Carabidae	MN122850_Carabus_hortensis	partial	x	x	x	x	x	x	x	x	x	x	x	x	x			13
30	Carabidae	MN245975_Harpalus_pensylvanicus	complete	x	x	x	x	x	x	x	x	x	x	x	x	x	x	x	15
31	Carabidae	MN310888_Harpalus_sinicus	complete	x	x	x	x	x	x	x	x	x	x	x	x	x	x	x	15
32	Carabidae	MN335930_Amara_aulica	partial	x	x	x	x	x	x	x	x	x	x	x	x	x	x	x	15
33	Carabidae	NC_044759_Carabus_granulatus	complete	x	x	x	x	x	x	x	x	x	x	x	x	x	x	x	15
34	Carabidae	NC_046469_Acoptolabrus_changeonleei	complete	x	x	x	x	x	x	x	x	x	x	x	x	x	x	x	15
35	Carabidae	MN480425_Carabus_smaragdinus	complete	x	x	x	x	x	x	x	x	x	x	x	x	x	x	x	15
36	Carabidae	Omophron_limbatum	complete	x	x	x	x	x	x	x	x	x	x	x	x	x	x	x	15
37	Carabidae	Notiophilus_quadripunctatus	complete	x	x	x	x	x	x	x	x	x	x	x	x	x	x	x	15
38	Cicindelidae	MF497813_Omus_cazieri	partial	x	x	x	x	x	x	x	x	x	x	x	x	x	x	x	15
39	Cicindelidae	MF497820_Pogonostoma_subtiligrossum	partial	x	x	x	x	x	x	x	x	x	x	x	x	x	x	x	15
40	Cicindelidae	MF497821_Manticora_tibialis	complete	x	x	x	x	x	x	x	x	x	x	x	x	x	x	x	15
41	Cicindelidae	NC_038191_Cicindela_anchoralis	complete	x	x	x	x	x	x	x	x	x	x	x	x	x	x	x	15
42	Trachypachidae	EU877954_Trachypachus_holmbergi	complete	x	x	x	x	x	x	x	x	x	x	x	x	x	x	x	15
43	Dytiscidae	MW465264_Rhithrodytes_bimaculatus	complete	x	x	x	x	x	x	x	x	x	x	x	x	x	x	x	15
44	Dytiscidae	MW465253_Lioporeus_pilatei	complete	x	x	x	x	x	x	x	x	x	x	x	x	x	x	x	15
45	Dytiscidae	MW465258_Nebrioporus_vagrans	complete	x	x	x	x	x	x	x	x	x	x	x	x	x	x	x	15
46	Dytiscidae	MW465255_Mystonectes_coelamboides	complete	x	x	x	x	x	x	x	x	x	x	x	x	x	x	x	15
47	Dytiscidae	MW465248_Hydroporus_planus	complete	x	x	x	x	x	x	x	x	x	x	x	x	x	x	x	15
		number		47	47	47	47	47	47	47	44	47	47	47	47	47	39	39
		length of alignment (base pairs)		678	168	1146	1551	693	789	954	1038	355	1344	294	1761	528	826	1491	13616	total alignment length
		application of GBlocks															752	1252	13303	total alignment length
		Substitution model (Modelfinder, BIC)		GTR+F+I+G4	TPM3u+F+I+G4	GTR+F+R5	GTR+F+R5	GTR+F+I+G4	GTR+F+I+G4	GTR+F+R5	GTR+F+R4	TIM+F+I+G4	GTR+F+R5	TIM+F+I+G4	TIM+F+R9	GTR+F+I+G4	GTR+F+R4	GTR+F+I+G4
